# Supplementary material for: Impact of point-of-care testing on the management of sexually transmitted infections in South Africa: Evidence from the HVTN702 HIV vaccine trial
Source: PubMed Central journal article supplement (PMC7614294; doi:10.1093/cid/ciac824), 2022-10-15
Supplement: EMS157961-supplement-Supplementary_Figure.pdf [file EMS157961-supplement-Supplementary_Figure.pdf]

Supplementary Figure 1A

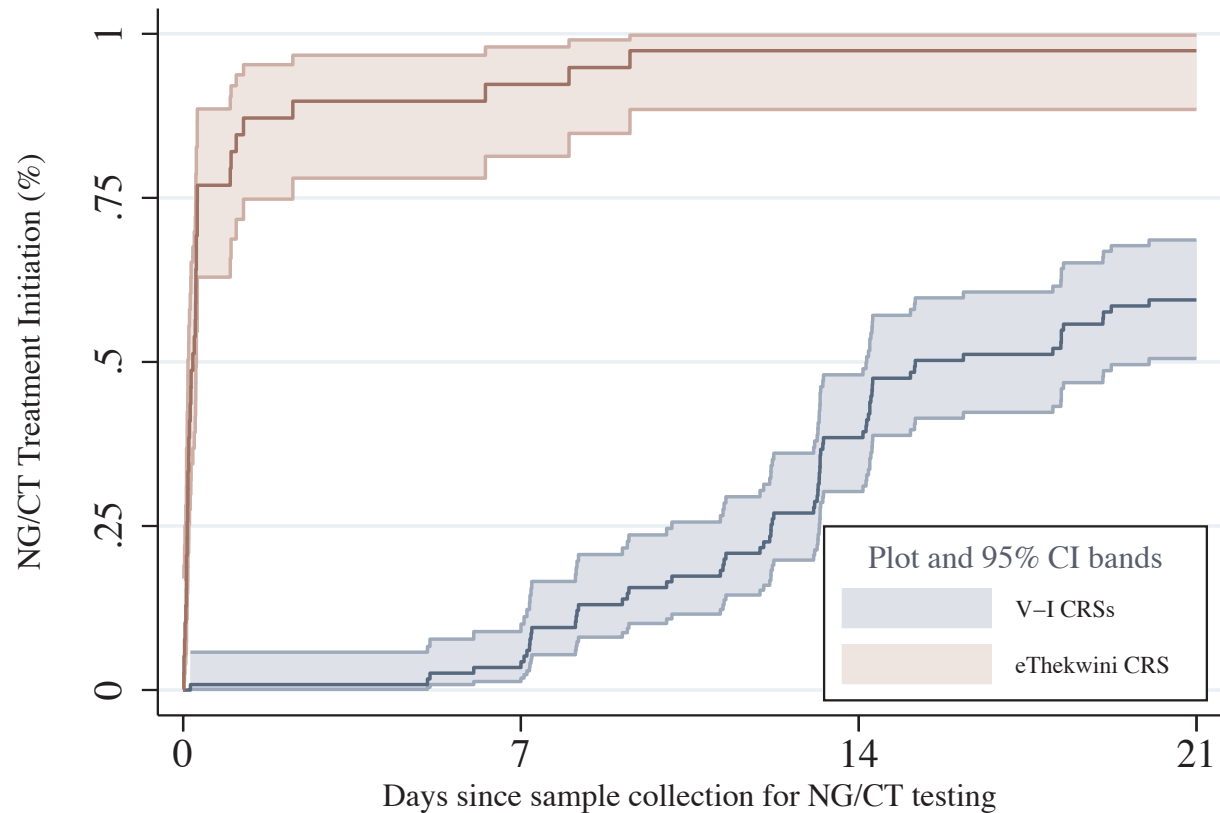

|               | No. at risk | (No. of events) |     | (No. of events) |    | (No. of events) |    | (No. of events) |
|---------------|-------------|-----------------|-----|-----------------|----|-----------------|----|-----------------|
| V-I CRSs      | 121         | (4)             | 111 | (40)            | 69 | (23)            | 44 |                 |
| eThekwini CRS | 39          | (36)            | 3   | (2)             | 1  | (0)             | 1  |                 |

Supplementary Figure 1B

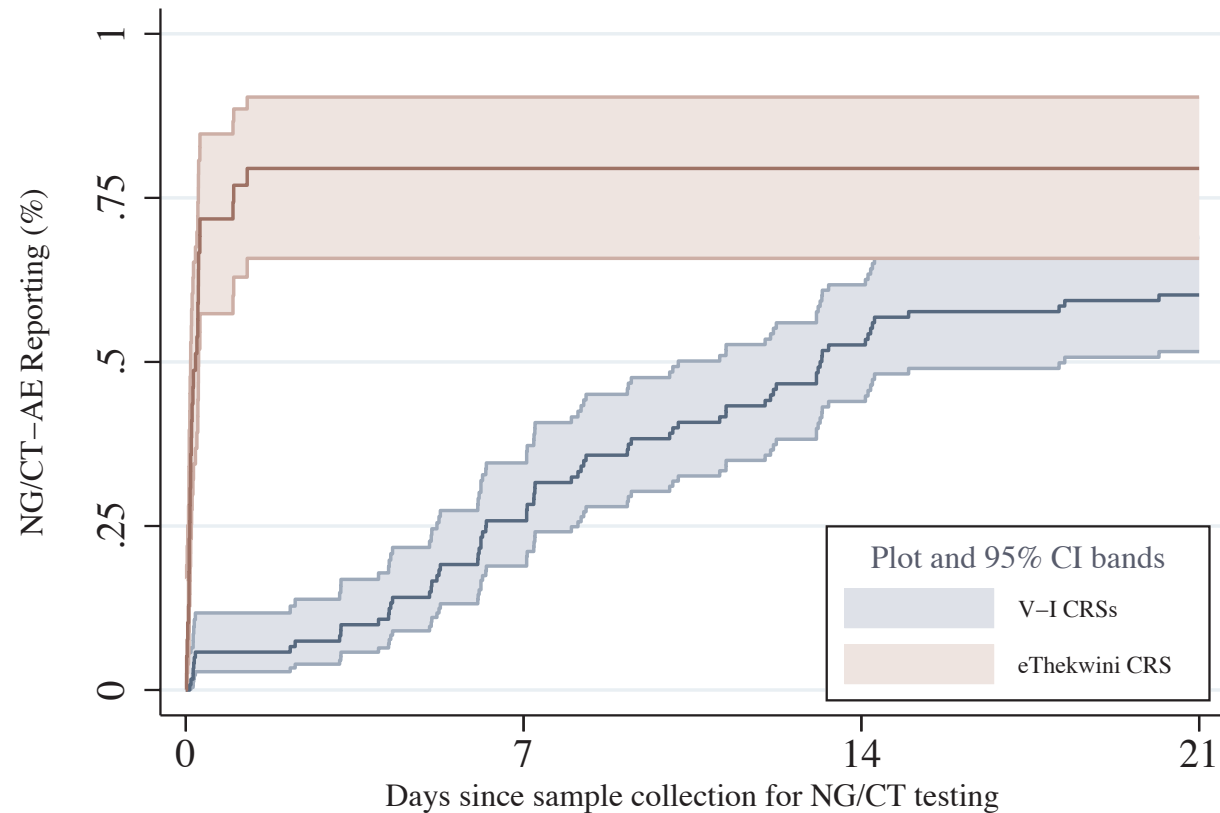

|               | No. at risk | (No. of events) |    | (No. of events) |    | (No. of events) |    | (No. of events) |
|---------------|-------------|-----------------|----|-----------------|----|-----------------|----|-----------------|
| V-I CRSs      | 121         | (31)            | 89 | (32)            | 56 | (9)             | 47 |                 |
| eThekwini CRS | 39          | (31)            | 8  | (0)             | 8  | (0)             | 8  |                 |
